# Supplementary material
Source: PubMed Central journal article supplement (PMC5813727)
Supplement: blood777136-suppl1.pdf [file blood777136-suppl1.pdf]

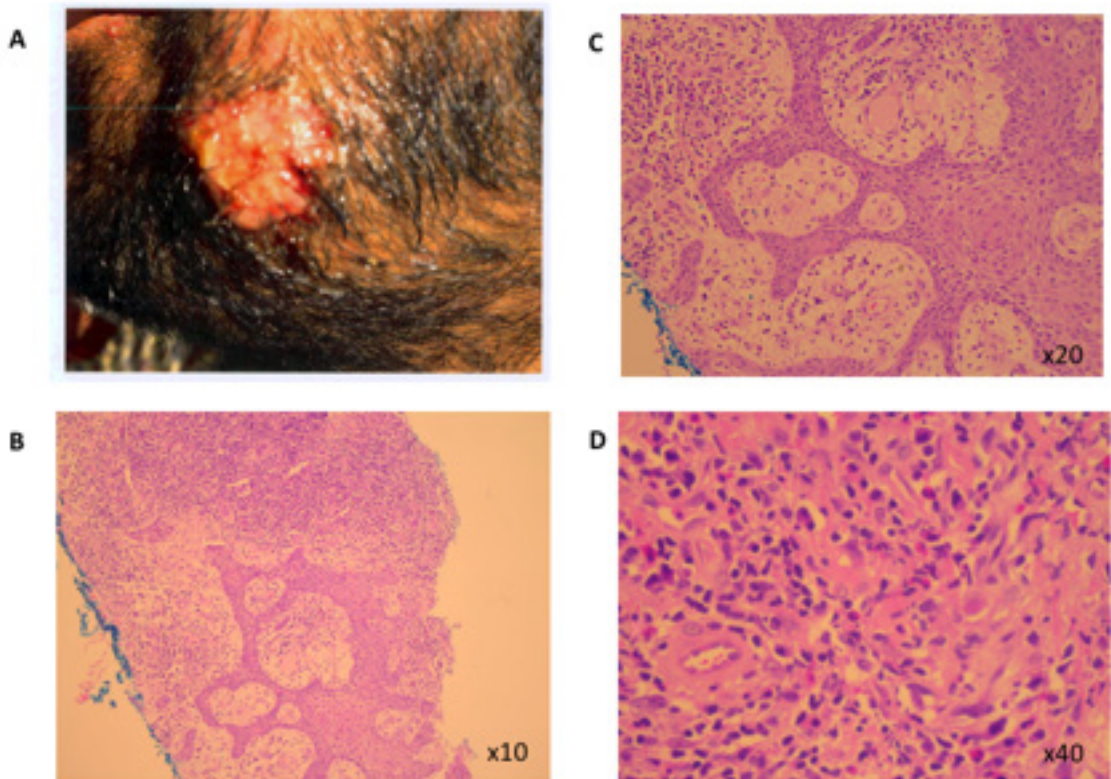

**Figure S1. Inflammatory facial ulcer 11 months post gene therapy.**  
(A) Photograph of lesion; Histological H&E staining (B, C and D).

## **FIGURE LEGEND**

**Figure S1. Inflammatory facial ulcer 11 months post gene therapy.**

(A) Photograph of lesion; (B and C) H&E histological appearance demonstrating pseudoepitheliomatous hyperplasia at the edge of the ulcer at x10 and x20 magnification, respectively; (D) H&E histological appearance demonstrating a dense inflammatory infiltrate of lymphocytes, plasma cells, eosinophils and neutrophils at x40 magnification.



# Analysis of integration site distributions and relative clonal abundance for subject pWAS\_UK11

Apr 28 2017

## Introduction

The attached report describes results of analysis of integration site distributions and relative abundance for samples from gene therapy trials. For cases of gene correction in circulating blood cells, it is possible to harvest cells sequentially from blood to monitor cell populations. Frequency of isolation information can provide information on the clonal structure of the population. This report summarizes results for subject pWAS\_UK11 over time points m6, m12, m20 in UCGS genome draft hg38.

The samples studied in this report, the numbers of sequence reads, recovered integration vectors, and unique integration sites available for this subject are shown below. We quantify population clone diversity using Gini coefficient, Shannon index, and UC50. The Gini coefficient provides a measure of inequality in clone abundance in each sample. The coefficient equals zero when all sites are equally abundant (poisson) and increases as fewer sites account for more of the total (oligopoisn). Shannon index is another widely used measure of diversity and accounts for both abundance and evenness of the integration events. Alternatively, the UC50 is the number of unique clones which make up the top 50% of the sample's abundance. For polyclonal samples, one may expect a low Gini coefficient, high Shannon Index, and high UC50 (proportional to the total number of unique sites identified in the sample).

Under most circumstances only a subset of sites will be sampled. We thus include an estimate of sample size based on frequency of unique integration from the SoniLength method (Barré, 2012). The 'Size' column denotes the estimated lower bound for population size derived using Chao estimate (Chao, 1987). If sample replicates were present then estimates were subjected to jackknife bias correction.

| Trial | GTSF     | Replicates | Patient   | Timepoint | CellType    | TotalReads | InferredCells | UniqueSites | Fragment | VEN | S.chao1 | Gini   | Shannon | UC50 |
|-------|----------|------------|-----------|-----------|-------------|------------|---------------|-------------|----------|-----|---------|--------|---------|------|
| WAS   | GTSF277  | 4          | pWAS_UK11 | m6        | Boleils     | 1015853    | 4543          | 3803        | Shearing | NA  | 20148   | 0.1443 | 8.1681  | 1532 |
| WAS   | GTSF279  | 4          | pWAS_UK11 | m6        | Boleils     | 212871     | 314           | 237         | Shearing | NA  | 985     | 0.1991 | 5.3693  | 81   |
| WAS   | GTSF275  | 4          | pWAS_UK11 | m6        | Neutrophils | 784542     | 1963          | 1490        | Shearing | NA  | 7251    | 0.2063 | 7.1815  | 509  |
| WAS   | GTSF278  | 4          | pWAS_UK11 | m6        | NKcells     | 1088799    | 2949          | 2090        | Shearing | NA  | 757     | 0.2371 | 7.5072  | 616  |
| WAS   | GTSF274  | 4          | pWAS_UK11 | m6        | PBMC        | 885556     | 2061          | 1357        | Shearing | NA  | 4628    | 0.2280 | 6.9992  | 327  |
| WAS   | GTSF276  | 4          | pWAS_UK11 | m6        | Teils       | 1016780    | 5570          | 2996        | Shearing | NA  | 10620   | 0.4152 | 7.2942  | 488  |
| WAS   | GTSF121  | 4          | pWAS_UK11 | m12       | Boleils     | 898668     | 2159          | 1713        | Shearing | NA  | 7071    | 0.1757 | 7.3530  | 643  |
| WAS   | GTSF123  | 4          | pWAS_UK11 | m12       | Monocytes   | 355039     | 344           | 233         | Shearing | NA  | 2088    | 0.2827 | 5.9202  | 62   |
| WAS   | GTSF119  | 4          | pWAS_UK11 | m12       | Neutrophils | 541561     | 707           | 476         | Shearing | NA  | 8103    | 0.2963 | 5.2909  | 127  |
| WAS   | GTSF122  | 4          | pWAS_UK11 | m12       | NKcells     | 498233     | 688           | 466         | Shearing | NA  | 1850    | 0.2575 | 5.9939  | 127  |
| WAS   | GTSF118  | 4          | pWAS_UK11 | m12       | PBMC        | 456621     | 2047          | 1721        | Shearing | NA  | 7899    | 0.1468 | 7.3294  | 688  |
| WAS   | GTSF120  | 4          | pWAS_UK11 | m12       | Teils       | 965593     | 3050          | 1999        | Shearing | NA  | 8248    | 0.1797 | 7.3013  | 477  |
| WAS   | GTSF1491 | 4          | pWAS_UK11 | m20       | Boleils     | 693499     | 975           | 562         | Shearing | NA  | 2648    | 0.2827 | 6.1524  | 143  |
| WAS   | GTSF1493 | 4          | pWAS_UK11 | m20       | Monocytes   | 791066     | 127           | 60          | Shearing | NA  | 803     | 0.4867 | 3.3602  | 5    |
| WAS   | GTSF1489 | 4          | pWAS_UK11 | m20       | Neutrophils | 784120     | 1925          | 1226        | Shearing | NA  | 4433    | 0.2796 | 6.9410  | 333  |
| WAS   | GTSF1492 | 4          | pWAS_UK11 | m20       | NKcells     | 456570     | 523           | 361         | Shearing | NA  | 6729    | 0.2813 | 5.6614  | 100  |
| WAS   | GTSF1488 | 4          | pWAS_UK11 | m20       | PBMC        | 707262     | 6460          | 4335        | Shearing | NA  | 14817   | 0.2963 | 7.5829  | 1106 |
| WAS   | GTSF1490 | 4          | pWAS_UK11 | m20       | Teils       | 749603     | 1165          | 559         | Shearing | NA  | 1980    | 0.4150 | 5.8776  | 105  |

## Do any uniquely mapped clones account for greater than 20% of the total?

For some trials, a reporting criteria is whether any cell clones expand to account for greater than 20% of all clones. This is summarized below for subject pWAS\_UK11. Abundance is estimated using the SoniLength method. Data such as this must, of course, be interpreted in the context of results from other assays. Distances reported refer to transcription start sites (5').

No sites found in this patient which are greater than 20% of the total data.

## Do any multithit event account for greater than 20% of the total?

Up until now, the analysis has been looking at integration sites that can be uniquely mapped. But it is also helpful to look at reads finding multiple equally good alignments in the genome which can be referred to as 'Multithit' if an integration site occurred within a repeat element (i.e. Alu, LINE, SINE, etc), then it might be helpful to access those sites for potential detrimental effects. These collections of sequences are analyzed separately due to their ambiguity. To make some sense of these multithits, we bin any sequence(s) which share 1 or more genomic locations hence forming pseudo collections which can be referred to as OTUs (operation taxonomic units). Once the OTUs are formed, we compare breakdowns of unique sites and multithits. There is also a case for any multithits which higher abundance than a unique site in a given sample. Below is a table similar to the one shown previously except we show any events instead of genomic locations which are OTUs as opposed to clones in the data.

No multithits sites found in this patient which are greater than 20% of the total data.

## Relative abundance of cell clones

The relative abundance of cell clones is summarized in the attached bar graphs. The cell fraction studied is named at the top, the time points are marked at the bottom. The different bars in each panel show the major cell clones, as marked by integration sites. A key to the sites is shown at the right. Throughout the whole report, each integration site is assigned a GeneName given by:

- GeneName refers to the closest gene to either end and strand,
- L indicates the site is within a L1 repeat element,
- S indicates the site is within a SINE repeat element,
- I indicates the gene was associated with lymphoma in humans.

Integration sites were recovered using Ligation mediated PCR after random fragmentation of genomic DNA, which reduces recovery bias compared with restriction enzyme cleavage. Relative abundance was not measured from read counts, which are known to be inaccurate, but from marks introduced into DNA specimens prior to PCR amplification using the SoniLength method (Barré, 2012).

In the barplots below, the x-axis indicates each sample type and time point, the y-axis is scaled by proportion of the total, not number of cells sampled. Comparison to the plot above helps distinguish samples with the yield of integration sites from samples with high yield and clonal expansions. The key indicates the 10 most abundant clones in each sample. Cutoff values for binning clones as LowAbund (grey) are indicated at the top of each panel.

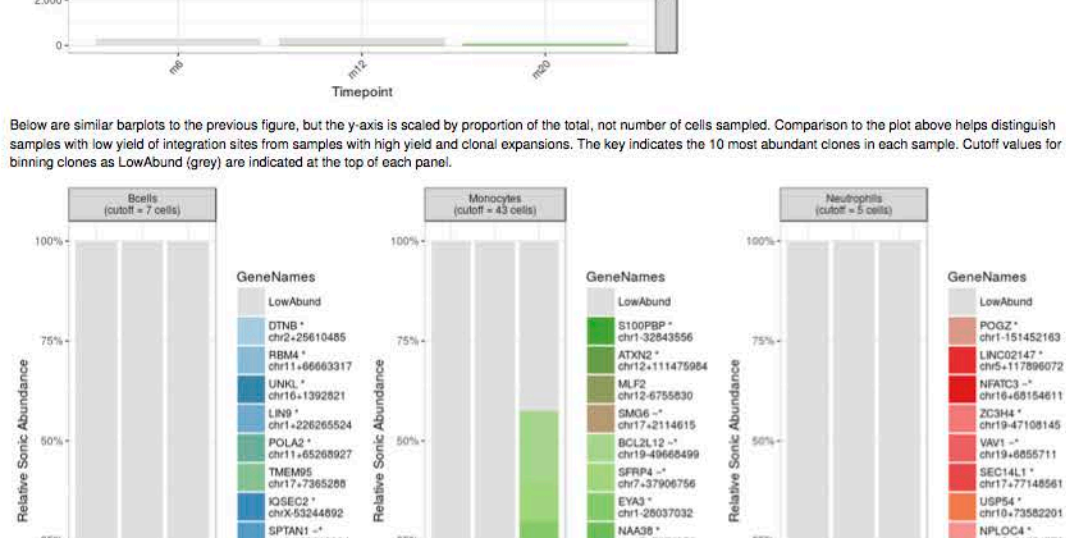

Below are similar barplots to the previous figure, but the y-axis is scaled by proportion of the total, not number of cells sampled. Comparison to the plot above helps distinguish samples with the yield of integration sites from samples with high yield and clonal expansions. The key indicates the 10 most abundant clones in each sample. Cutoff values for binning clones as LowAbund (grey) are indicated at the top of each panel.

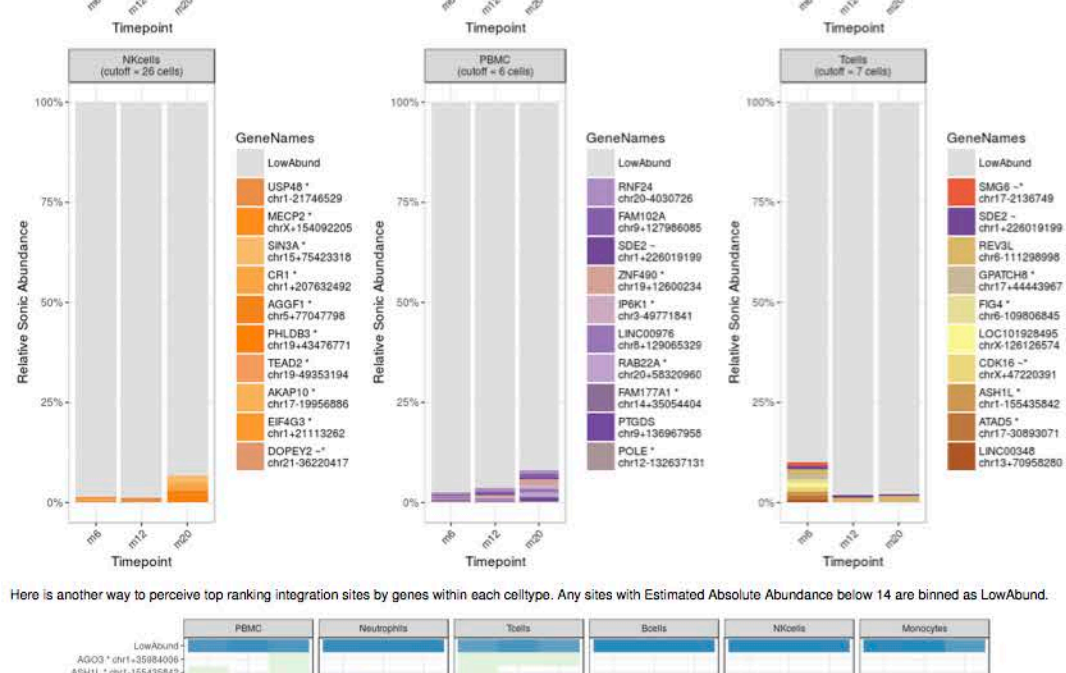

Here is another way to perceive top ranking integration sites by genes within each celltype. Any sites with Estimated Absolute Abundance below 14 are binned as LowAbund.

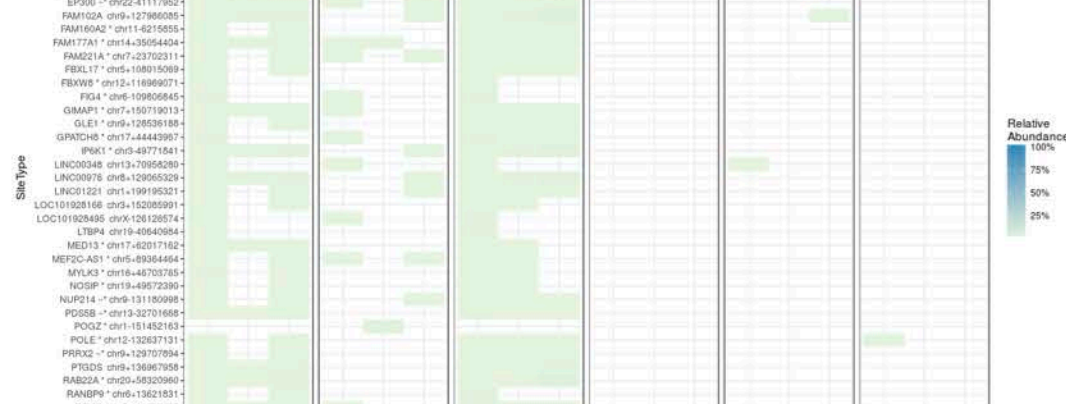

## Longitudinal behavior of major clones

When multiple time points are available, it is of interest to track the behavior of the most abundant clones. A plot of the relative abundances of major clones, based on output from SoniLength, is shown below. For cases where only a single time point is available, the data is just plotted as unsorted points.

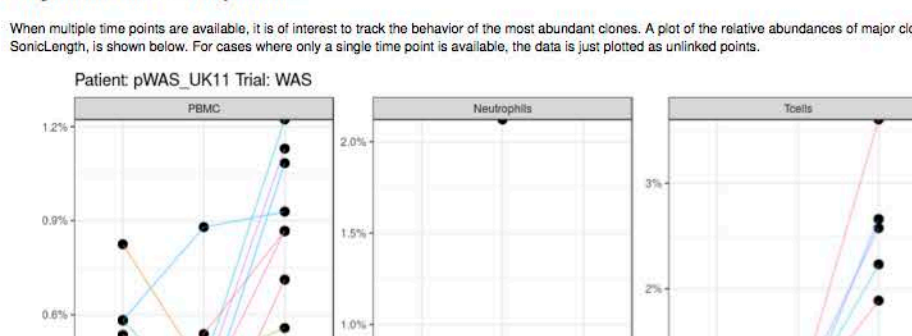

## Integration sites near particular genes of interest

Integration sites near genes that have been associated with adverse events are of particular interest. Thus, we have cataloged all integration sites for which a gene of interest is the nearest cancer-related gene. Results are summarized below as a scatter plot where the y-axis shows relative abundance of the integration site and x-axis is distance to the nearest oncogene's 5' end.

Negative distances indicate that the integration site is downstream from 5' end after the TSS. Positive distances indicate that the integration site is upstream from (i.e. before) the TSS. Note that all RefSeq splicing isoforms are used for this analysis, so the reference TSS may not be the same for each listed integration site.

## LMO2

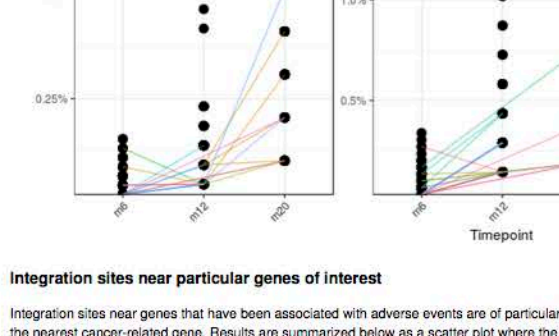

| Timepoint | CellType | Integration Site | nearestOnco | distToNearestOnco | sonicAbundance | sonicAbundanceRank |
|-----------|----------|------------------|-------------|-------------------|----------------|--------------------|
| m6        | Boleils  | chr11-3388872    | LMO2        | 3962              | 1              | 3803               |
| m20       | PBMC     | chr11-33987325   | LMO2        | -75036            | 1              | 4335               |

## IKZF1

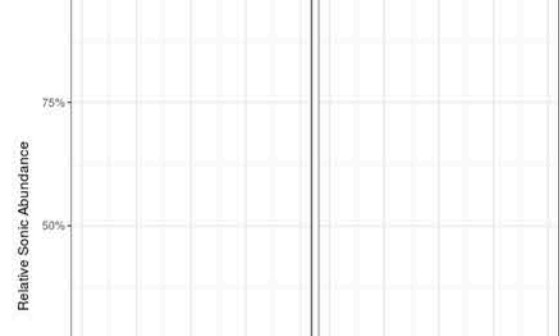

| Timepoint | CellType | Integration Site | nearestOnco | distToNearestOnco | sonicAbundance | sonicAbundanceRank |
|-----------|----------|------------------|-------------|-------------------|----------------|--------------------|
| m12       | Teils    | chr7-5020818     | IKZF1       | -43454            | 1              | 1999               |
| m6        | Boleils  | chr7-42525087    | IKZF1       | -48995            | 2              | 549                |
| m6        | NKcells  | chr7-50258668    | IKZF1       | -47116            | 1              | 2090               |
| m20       | PBMC     | chr7-50319108    | IKZF1       | 62                | 1              | 4335               |

## CND2

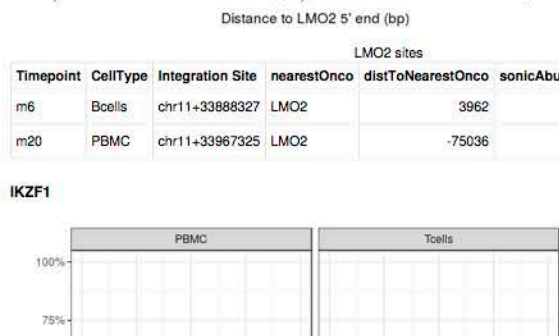

| Timepoint | CellType | Integration Site | nearestOnco | distToNearestOnco | sonicAbundance | sonicAbundanceRank |
|-----------|----------|------------------|-------------|-------------------|----------------|--------------------|
| m12       | Teils    | chr12-4185175    | CND2        | -8850             | 10             | 14                 |
| m12       | Boleils  | chr12-4251002    | CND2        | -22723            | 1              | 1713               |
| m6        | PBMC     | chr12-4340473    | CND2        | 6878              | 1              | 1353               |
| m6        | Teils    | chr12-4185175    | CND2        | -8850             | 17             | 29                 |
| m6        | NKcells  | chr12-4207289    | CND2        | -56454            | 1              | 2090               |

## HMG2

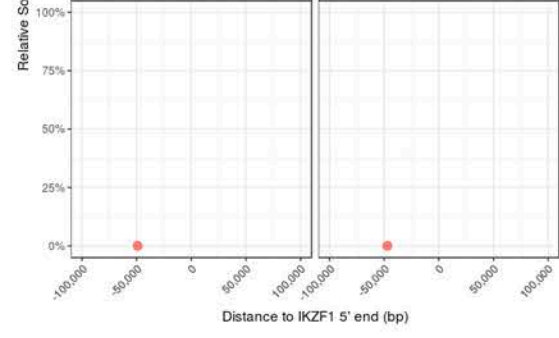

| Timepoint | CellType | Integration Site | nearestOnco | distToNearestOnco | sonicAbundance | sonicAbundanceRank |
|-----------|----------|------------------|-------------|-------------------|----------------|--------------------|
| m12       | Boleils  | chr12-6564758    | HMG2        | 23068             | 1              | 1713               |
| m6        | Boleils  | chr12-6540316    | HMG2        | 5957              | 1              | 3803               |
| m20       | PBMC     | chr12-6578992    | HMG2        | -4537             | 2              | 897                |

## MECOM

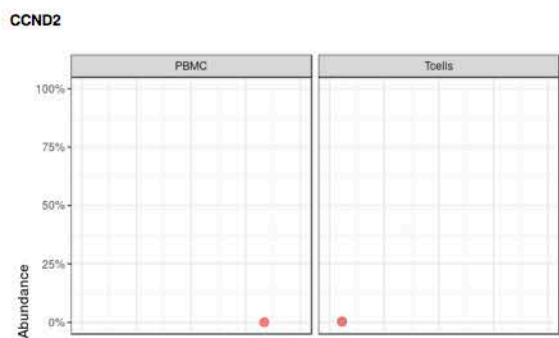

| Timepoint | CellType | Integration Site | nearestOnco | distToNearestOnco | sonicAbundance | sonicAbundanceRank |
|-----------|----------|------------------|-------------|-------------------|----------------|--------------------|
| m12       | NKcells  | chr186243565     | MECOM       | -9581             | 1              | 466                |

## What are the most frequently occurring gene types in subject pWAS\_UK11?

The word clouds below show the abundances of integration sites as designated by genes for each sample. Each word cloud is labeled by the timepoint, celltype, and the range of clone abundance for the top 100 sites.

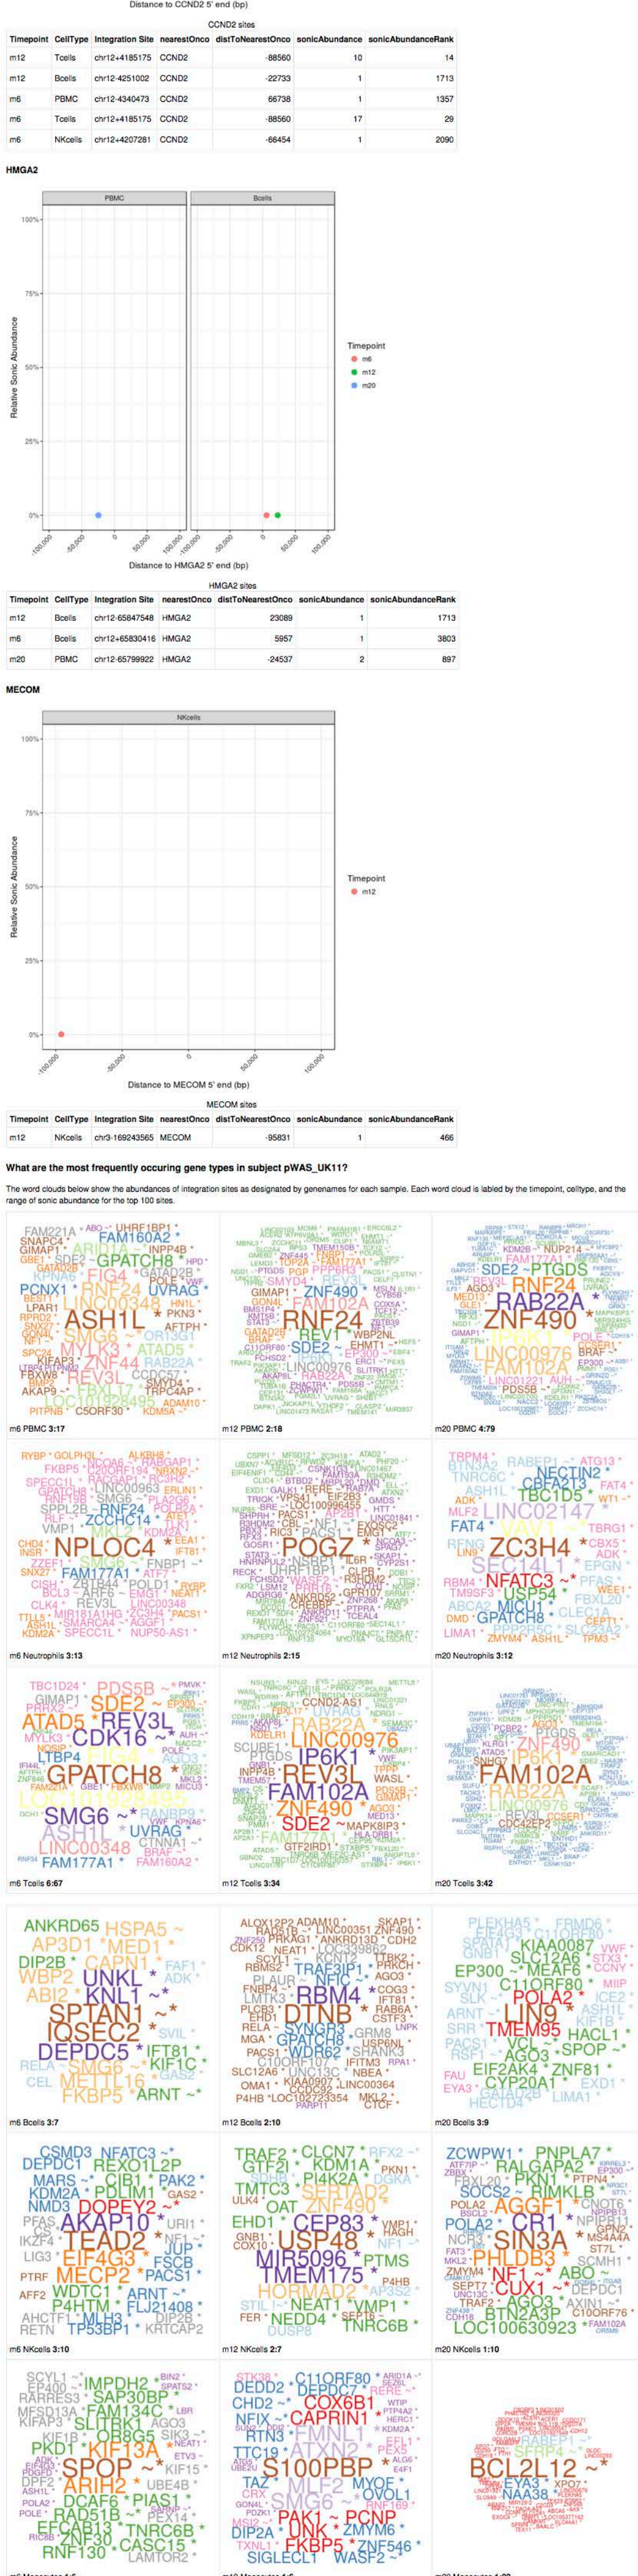



Integration sites shared between cell types.

Month 6

|             | Bcells | Monocytes | Neutrophils | NKcells | PBMC | Tcells |
|-------------|--------|-----------|-------------|---------|------|--------|
| Bcells      | 3821   | 0         | 2           | 5       | 8    | 5      |
| Monocytes   | 0      | 237       | 5           | 2       | 2    | 1      |
| Neutrophils | 2      | 5         | 1499        | 14      | 43   | 63     |
| NKcells     | 5      | 2         | 14          | 2104    | 6    | 3      |
| PBMC        | 8      | 2         | 43          | 6       | 1362 | 317    |
| Tcells      | 5      | 1         | 63          | 3       | 317  | 3016   |

Month 12

|             | Bcells | Monocytes | Neutrophils | NKcells | PBMC | Tcells |
|-------------|--------|-----------|-------------|---------|------|--------|
| Bcells      | 1725   | 4         | 6           | 5       | 17   | 3      |
| Monocytes   | 4      | 238       | 7           | 3       | 6    | 0      |
| Neutrophils | 6      | 7         | 478         | 8       | 16   | 2      |
| NKcells     | 5      | 3         | 8           | 468     | 14   | 0      |
| PBMC        | 17     | 6         | 16          | 14      | 1732 | 42     |
| Tcells      | 3      | 0         | 2           | 0       | 42   | 2014   |

Month 20

|             | Bcells | Monocytes | Neutrophils | NKcells | PBMC | Tcells |
|-------------|--------|-----------|-------------|---------|------|--------|
| Bcells      | 583    | 0         | 8           | 2       | 10   | 0      |
| Monocytes   | 0      | 60        | 0           | 0       | 1    | 0      |
| Neutrophils | 8      | 0         | 1237        | 9       | 112  | 13     |
| NKcells     | 2      | 0         | 9           | 362     | 8    | 2      |
| PBMC        | 10     | 1         | 112         | 8       | 4370 | 110    |
| Tcells      | 0      | 0         | 13          | 2       | 110  | 564    |
